# Supplementary material
Source: publisher figshare collection journal article supplement (https://tandf.figshare.com/ndownloader/files/22904006)
Supplement: Supplementary file 1 [file 22904006]

**Supplementary Materials**

Experimental, quantum computational study and *in-vitro* antidiabetic activity of oxidovanadium(IV) complexes incorporating 2,2'-bis(pyridylmethyl)amine and polypyridyl ligands

NEETU PATEL, A.K. PRAJAPATI, R.N. JADEJA*, I.P. TRIPATHI and N. DWIVEDI


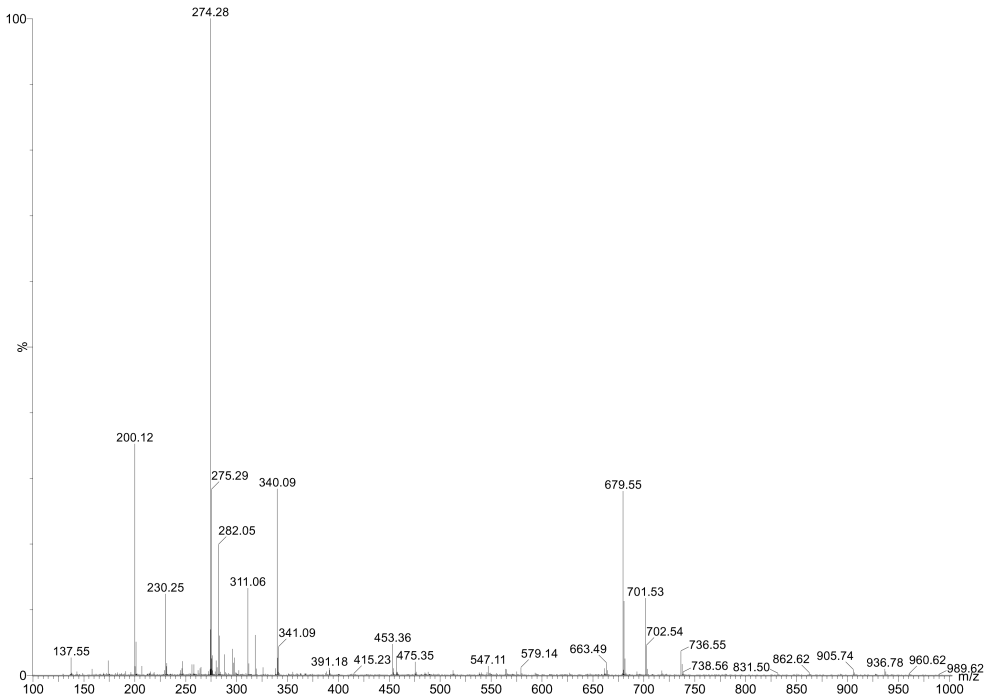


(a) +ve


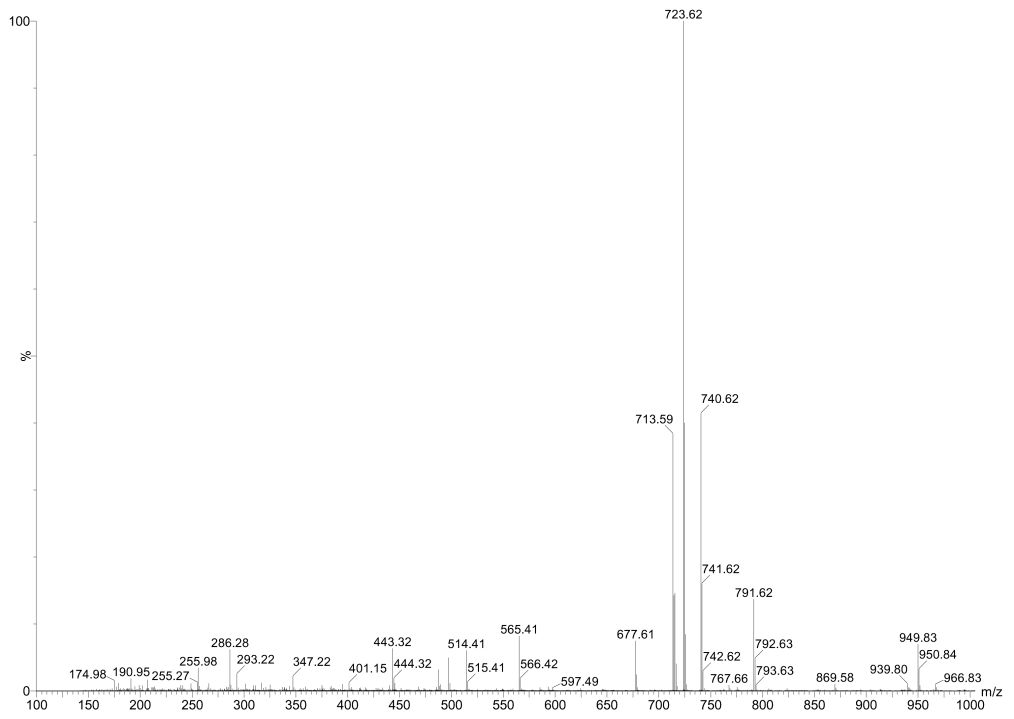


(b) -ve

Figure S1. ESI mass spectra of complex **1**.


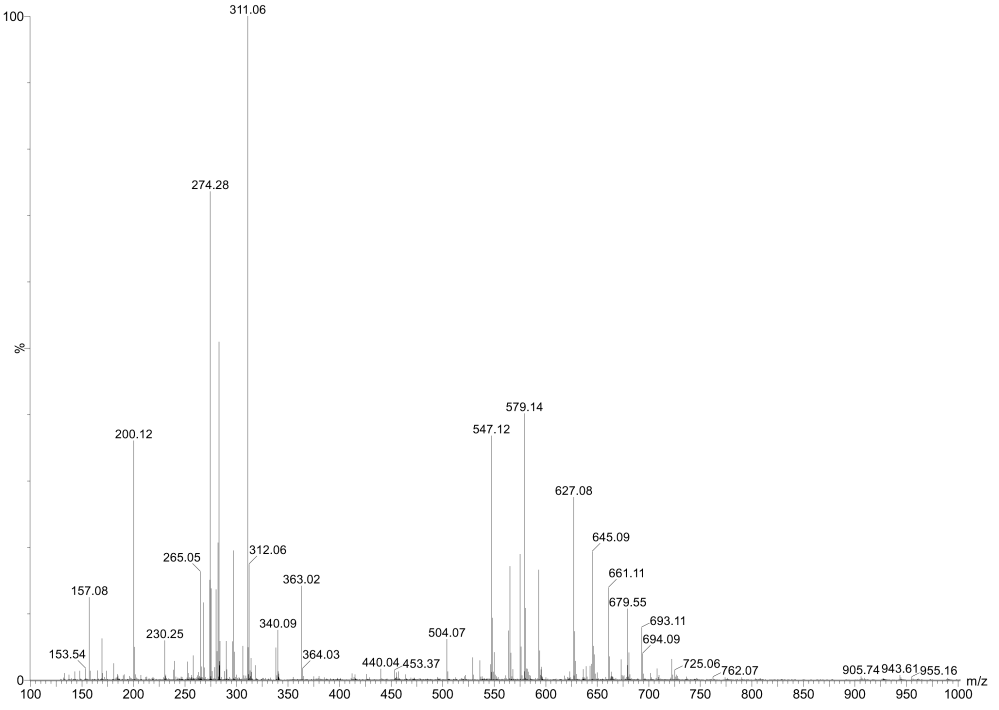


(a) +ve


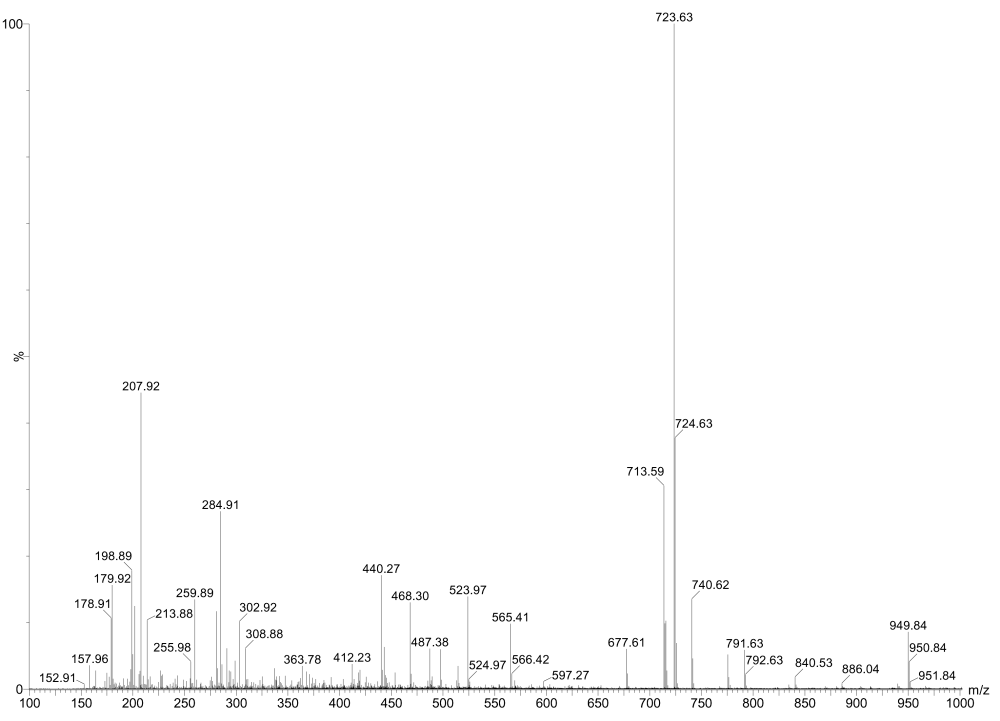


(b) –ve

Figure S2. ESI mass spectra of complex **2**.


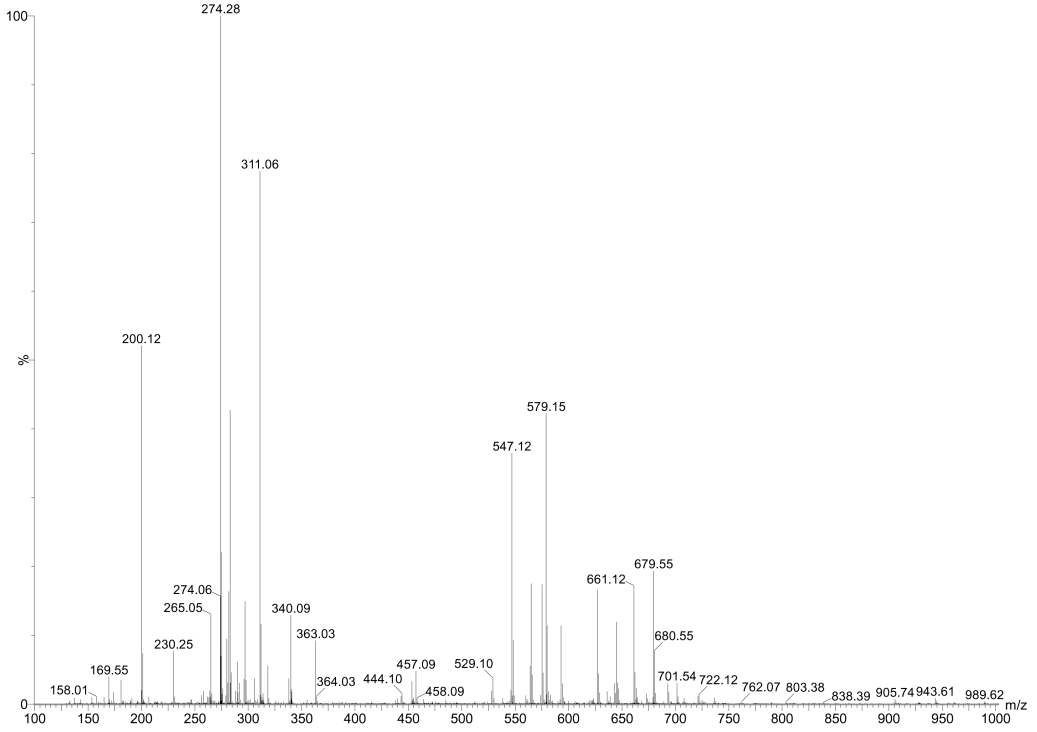


(a) +ve


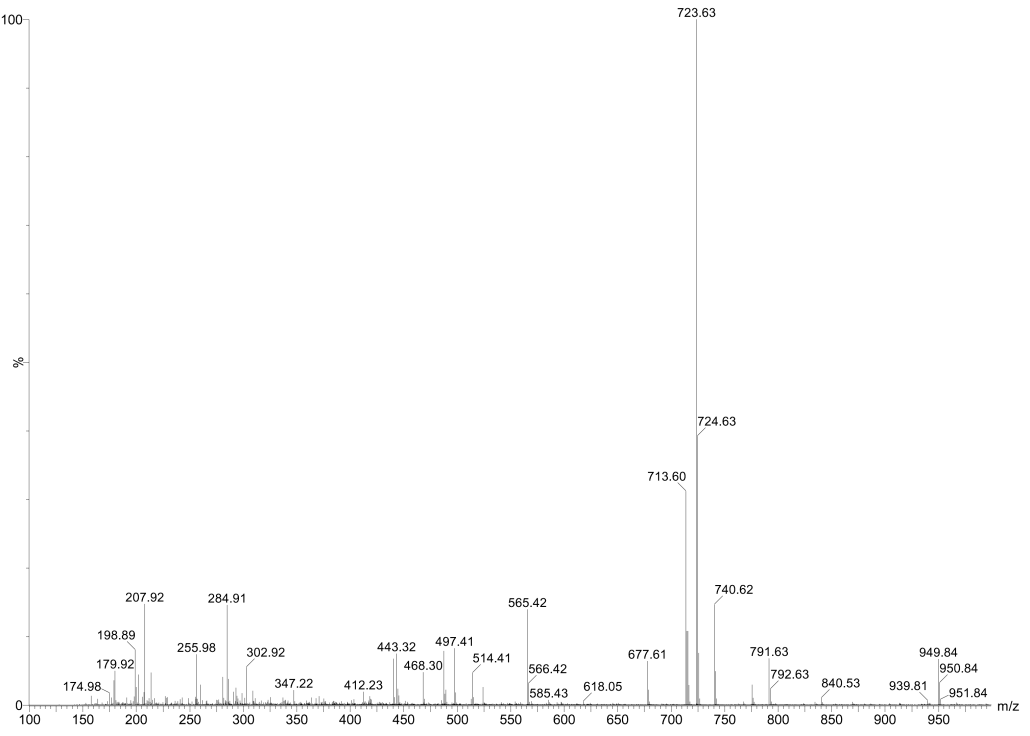


(b) –ve

Figure S3. ESI mass spectra of complex **3**.


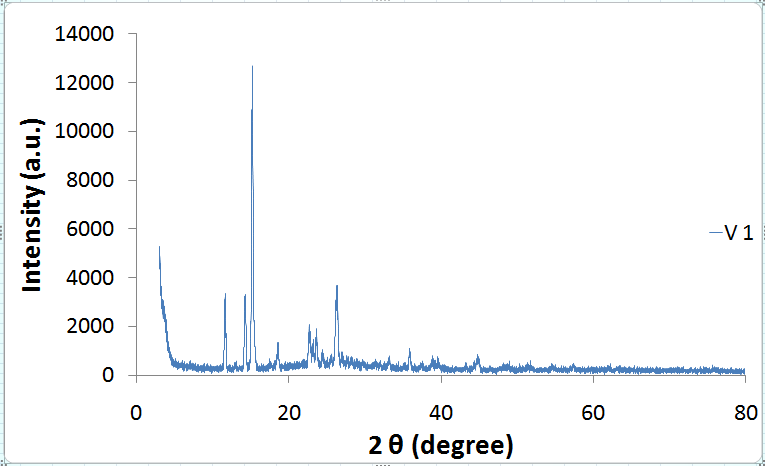


Figure S4. Powder XRD data of complex **1**.


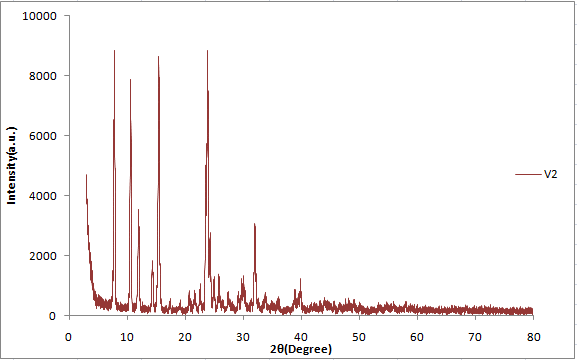


Figure S5. Powder XRD data of complex **2**.


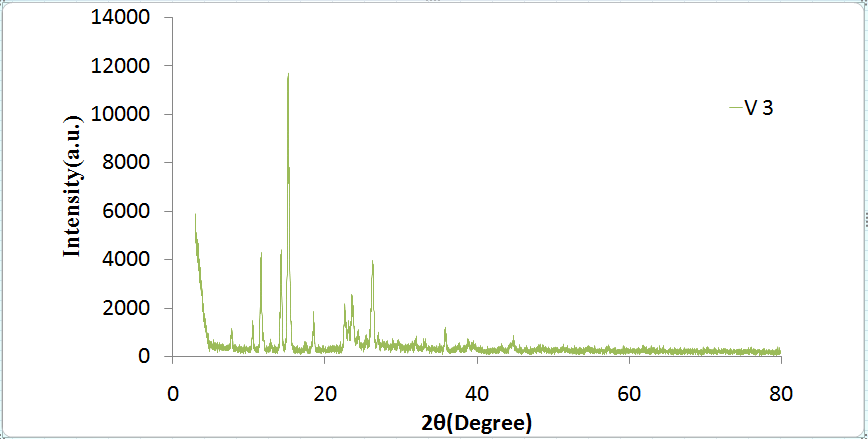


Figure S6. Powder XRD data of complex **3**.


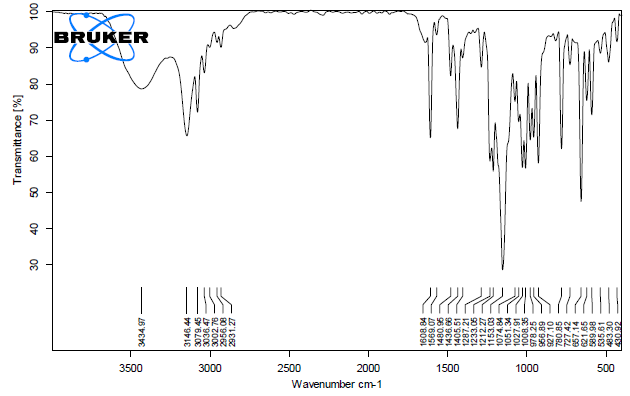


Figure S7. FT-IR data of complex **1**.


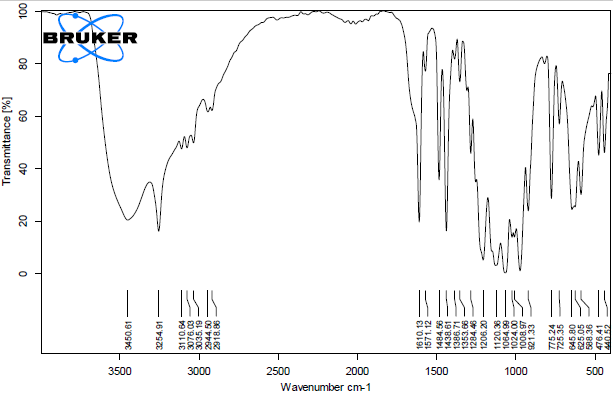


Figure S8. FT-IR data of complex **2**.


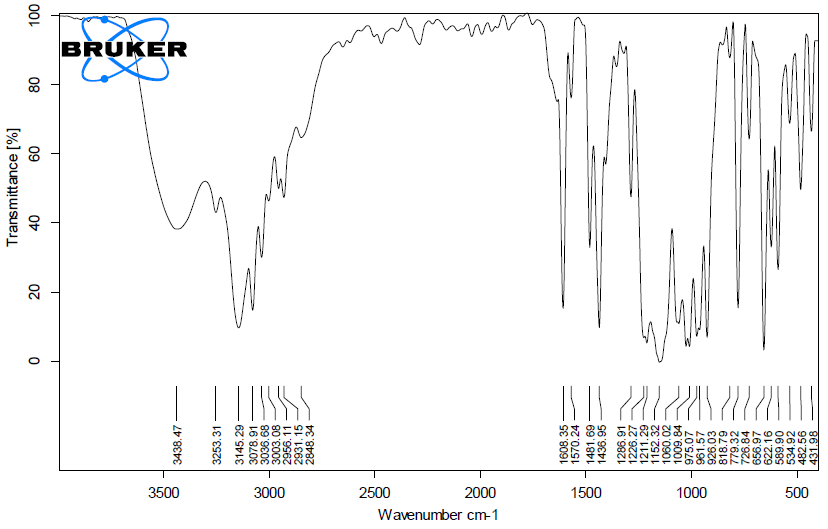


Figure S9. FT-IR data of complex **3**.
